# Supplementary material
Source: PubMed Central journal article supplement (PMC5210154)
Supplement: EMBJ-36-42-s002.pdf [file EMBJ-36-42-s002.pdf]

## Expanded View Figures

### Figure EV1. TRIM16 mediates IL-1 $\beta$ secretion.

- A Knockdown efficacies as determined by immunoblots.
  - B LDH release data for samples in Fig 1A.
  - C, D Levels of (C) IL-1 $\beta$  and (D) LDH release were determined in supernatants from THP-1 cells subjected to knockdowns as indicated, treated with 100 ng/ml LPS overnight, then starved in EBSS for 3 h.
  - E LDH release results for samples in Fig 1C.
  - F Co-IP analysis of interactions between flag-TRIM16 with myc-pro-IL-1 $\beta$  in HEK293T cells.
  - G Immunoblot analyses of knockdown efficacies in THP-1 cells.
  - H LDH release data for samples in Fig 1E.
  - I Immunoblot analyses of the levels of mL-1 $\beta$  in supernatants from THP-1 cells that were subjected to knockdown as indicated and were sequentially treated with LPS and LLOMe.
  - J LDH release data from samples in Fig 1F.
  - K, L Levels of (K) IL-1 $\beta$  and (L) LDH release was determined in supernatants from THP-1 cells subjected to knockdown as indicated, treated with 100 ng/ml LPS overnight, then starved in EBSS for 3 h.
  - M Immunoblot analyses of knockdown efficacies in primary human MDM cells.
  - N LDH release results for samples in Fig 1G.
  - O Intracellular localization analysis of TRIM16, pro-IL-1 $\beta$ , and LAMP2 by confocal microscopy. Cells, THP-1. Line tracings correspond to arrows. Scale bars, 5  $\mu$ m.
- Data information: Means  $\pm$  SEM;  $n \geq 5$ , except for immunoblot quantifications and TRIM screen where  $n \geq 3$ . \* $P < 0.05$ ,  $^{\dagger}P \geq 0.05$  (t-test for N; ANOVA for B, C, D, H, J, K, L).

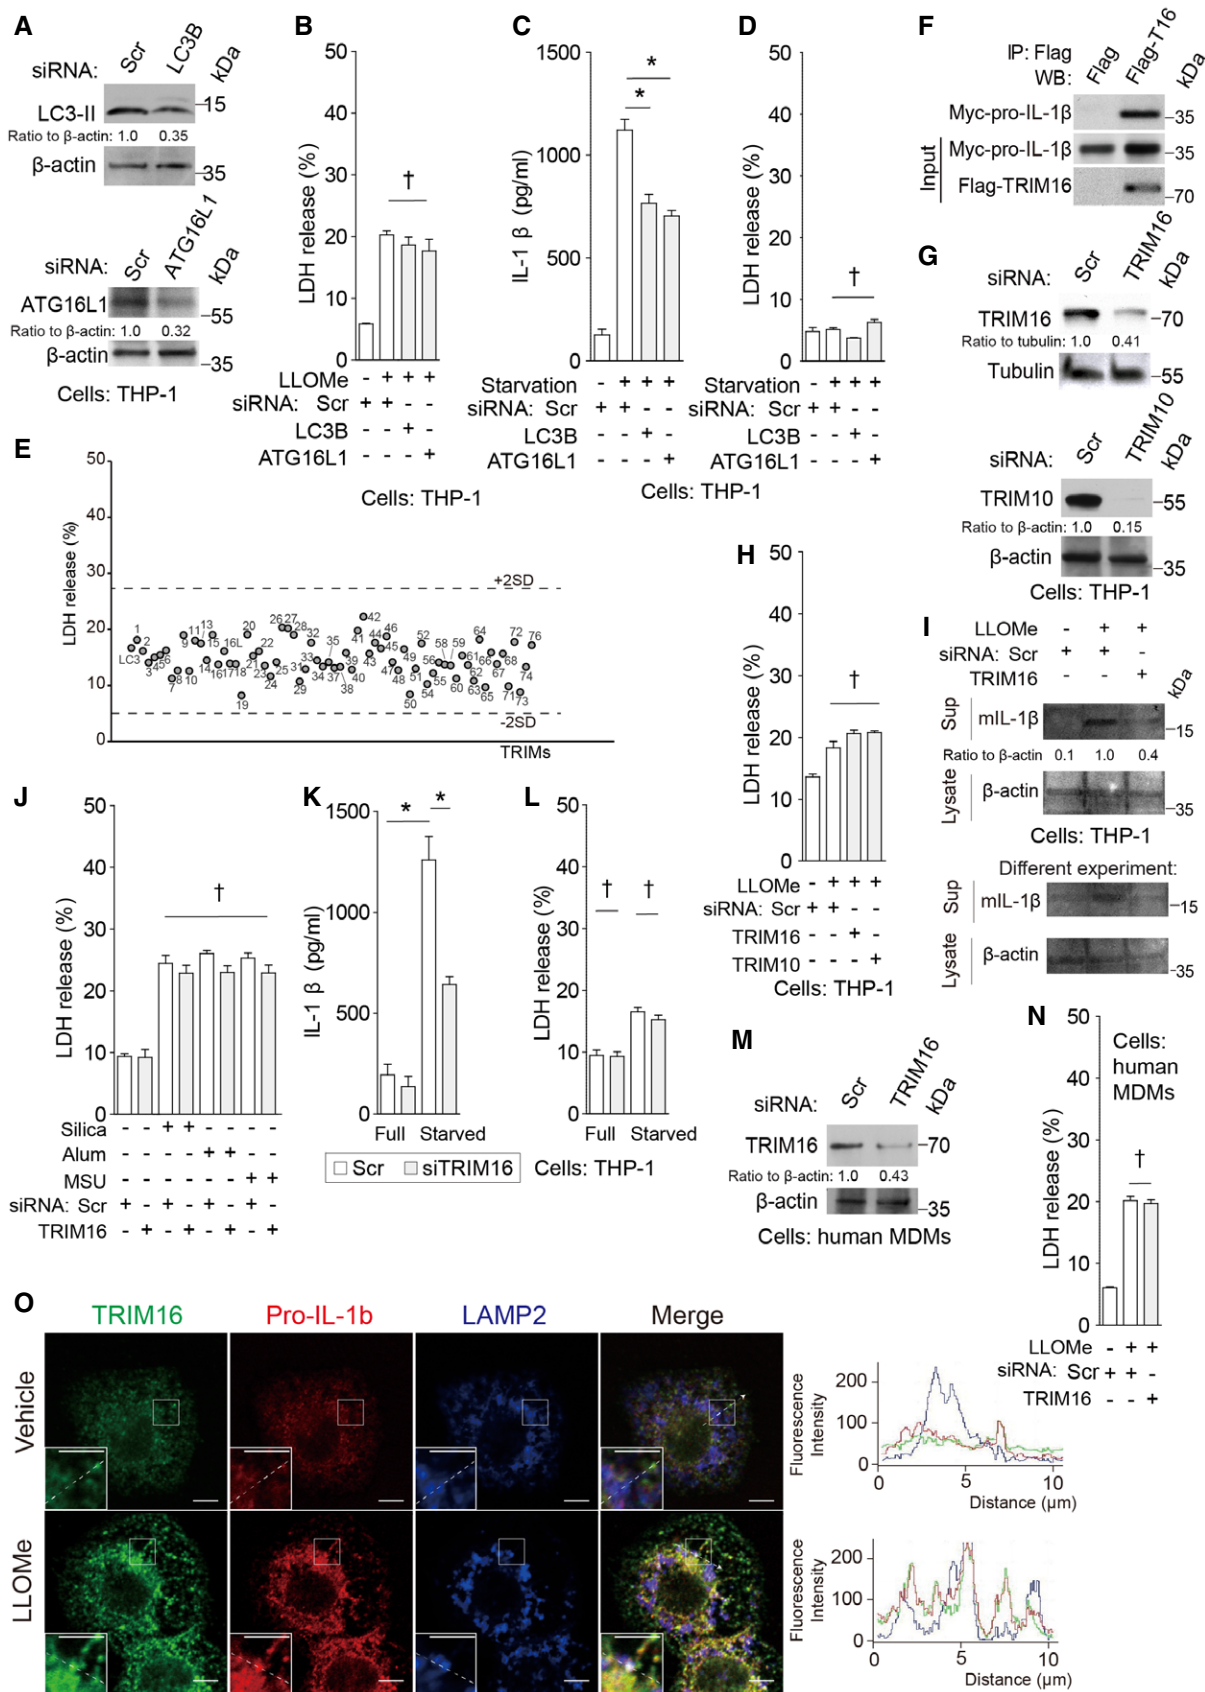

Figure EV1.

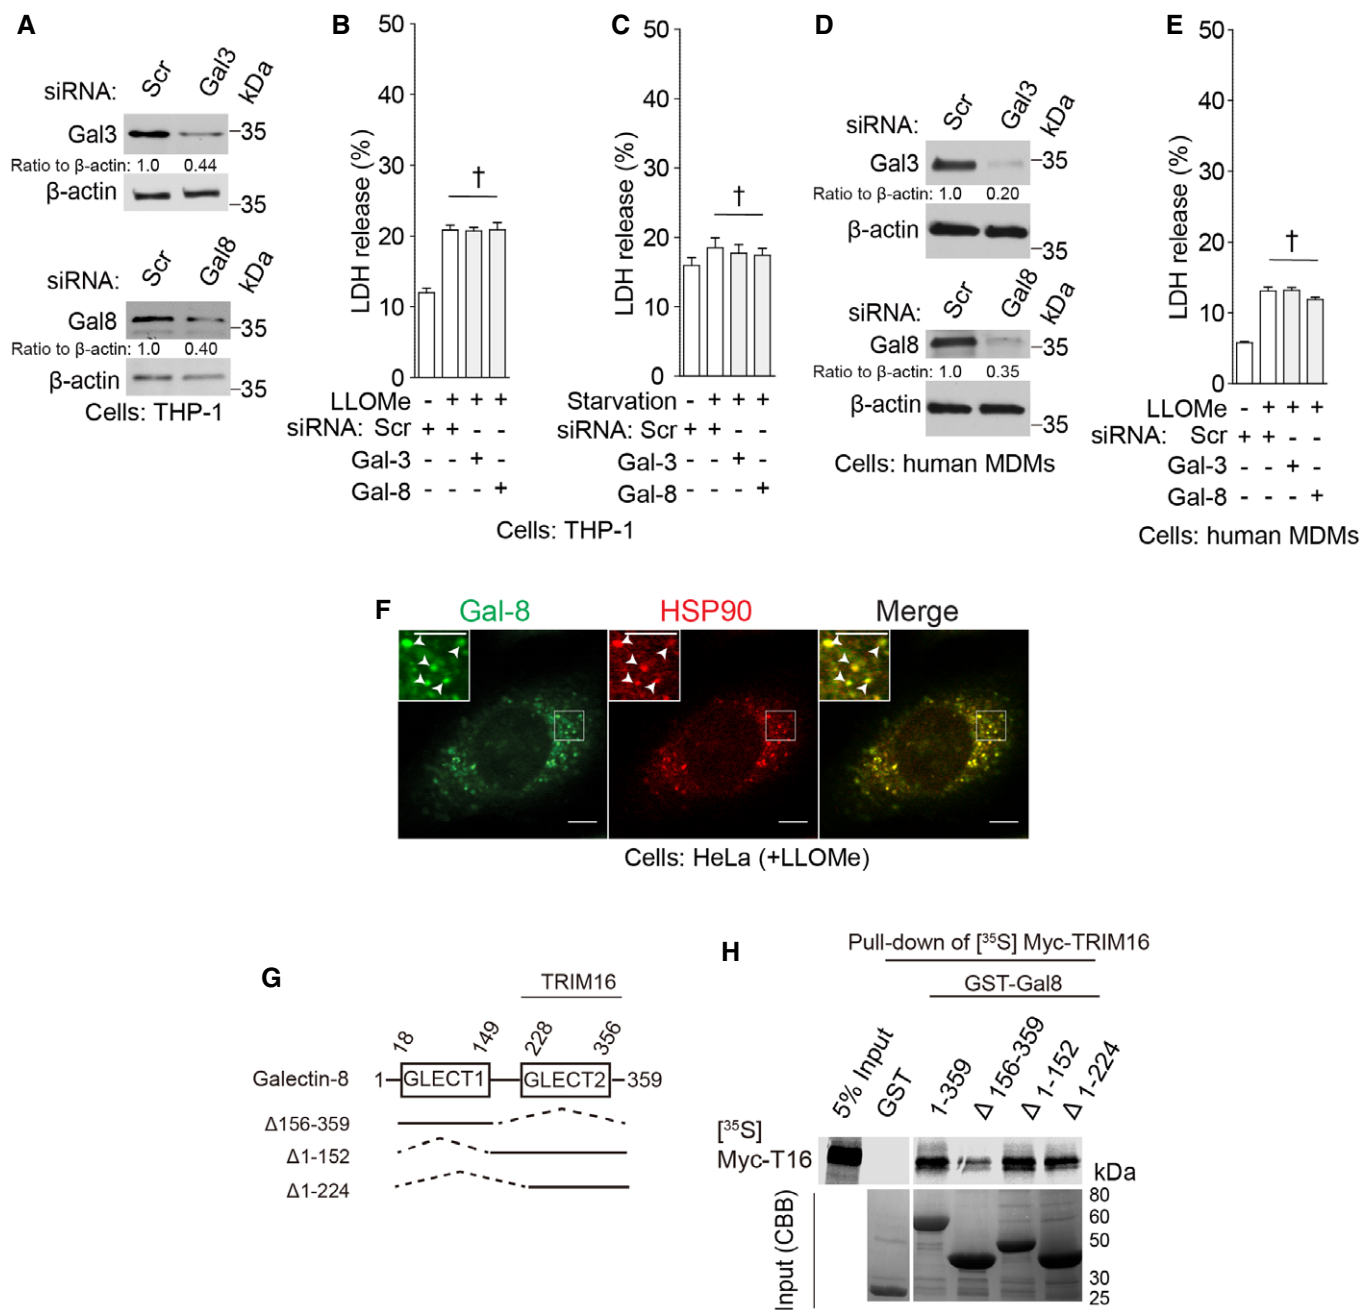

**Figure EV2. Galectin-8 participates in IL-1 $\beta$  secretion and interacts with TRIM16.**

A Immunoblot analyses of knockdown efficacies in THP-1 cells.

B, C LDH release data for samples in (B) Fig 2A and (B) Fig 2B.

D Immunoblot analyses of knockdown efficacies in primary human MDMs.

E LDH release data for samples in Fig 2C.

F Confocal microscopy of HeLa cells treated with LLOMe and stained for galectin-8 and HSP90. Arrowheads in enlarged insets indicate colocalization. Scale bars, 5  $\mu$ m.

G Galectin-8 domains and deletion constructs used.

H *In vitro* translated and radiolabeled [ $^{35}$ S] myc-HA-TRIM16 was incubated with full-length- and deletions of GST-galectin-8 in the presence of flag-ULK1 and cold ATP, and GST pull downs were performed and [ $^{35}$ S] radiolabeled Myc-HA-TRIM16 detected by SDS-PAGE and autoradiography. Amounts of GST fusion proteins are shown in Coomassie brilliant blue (CBB)-stained gels.

Data information: Means  $\pm$  SEM;  $n \geq 5$ , except for immunoblot quantifications where  $n \geq 3$ .  $^{\dagger}P \geq 0.05$  (ANOVA for B, C, E).

**Figure EV3. TRIM16 recruits IL-1 $\beta$  to LC3-positive carrier membranes for secretion and motifs in TRIM16 and Sec22b.**

- A, B IL-1 $\beta$  levels in supernatants of HeLa cells reconstituted with flag-pro-IL-1 $\beta$  and myc-caspase-1 and treated as indicated.
- C CRISPR TRIM16 mutant A9 in HeLa cells (Chauhan *et al*, 2016).
- D Processing of pro-IL1 $\beta$  detected by immunoblotting of lysates from HeLa cells (wild type and TRIM16<sup>KO</sup>) reconstituted with pro-IL-1 $\beta$  and pro-caspase-1 by transfection and treated with LLOMe in the presence of autolysosomal/lysosomal degradation inhibitors E64D plus pepstatin. Ratios of mIL-1 $\beta$  to tubulin levels are shown below the blots.
- E Overlapping area (high content microscopy and processing) of GFP-Sec22b and LC3B in HeLa cells fed or starved in EBSS.
- F Alignments of the SNC1 domain of TRIM16, shown as they are annotated in the NCBI entry NP\_006461, where TRIM16 SNC1 domain is compared with R-SNAREs, including longin-containing SNAREs, in NCBI CDD:227472 (<http://www.ncbi.nlm.nih.gov/Structure/cdd/cddsrv.cgi?uid=227472>). Note that the SNC1 domain CDD: 227472 includes sequences from both longin and SNARE domains and that only the SNARE domains contain typical "O" ionic layers (the boxed R residues). Underlined residues, features of the SNARE motif in *Saccharomyces cerevisiae* (Sc) Snc1, with flanking layers maintaining hydrophobic interactions when this SNARE is in the four-helix bundle SNARE fusion complex; the N-terminal flanking parts encompass all layers of the SNARE motif of SNC1, whereas the C-terminal part shown encompasses a half of C-terminally positioned hydrophobic layers.
- G Domain organization of TRIM16 and Sec22b. The relationship between the NCBI-annotated domains (boxes) and predicted coiled-coil regions of TRIM16 (overlined regions; as annotated in UniProtKB – O95361) are indicated. The relationships between NCBI-annotated SNC1 motif (underlined region) and the NCBI-annotated longin and SNARE domains of Sec22b are shown.
- H, I LDH release controls corresponding to IL-1 $\beta$  secretion complementation experiments of TRIM16<sup>KO</sup> cells with TRIM16 Sec22b-interacting and its Sec22b-nonbinding mutant shown in Fig 3M and N.
- J Sub-regions selected for cross-correlation analysis of flag-TRIM-16 and GFP-Sec22b super-resolution data.

Data information: Means  $\pm$  SEM;  $n \geq 5$ , except for immunoblot quantifications and image analyses where  $n \geq 3$ . \* $P < 0.05$ ,  $\dagger P \geq 0.05$  (t-test for A, B, E; ANOVA for H, I).

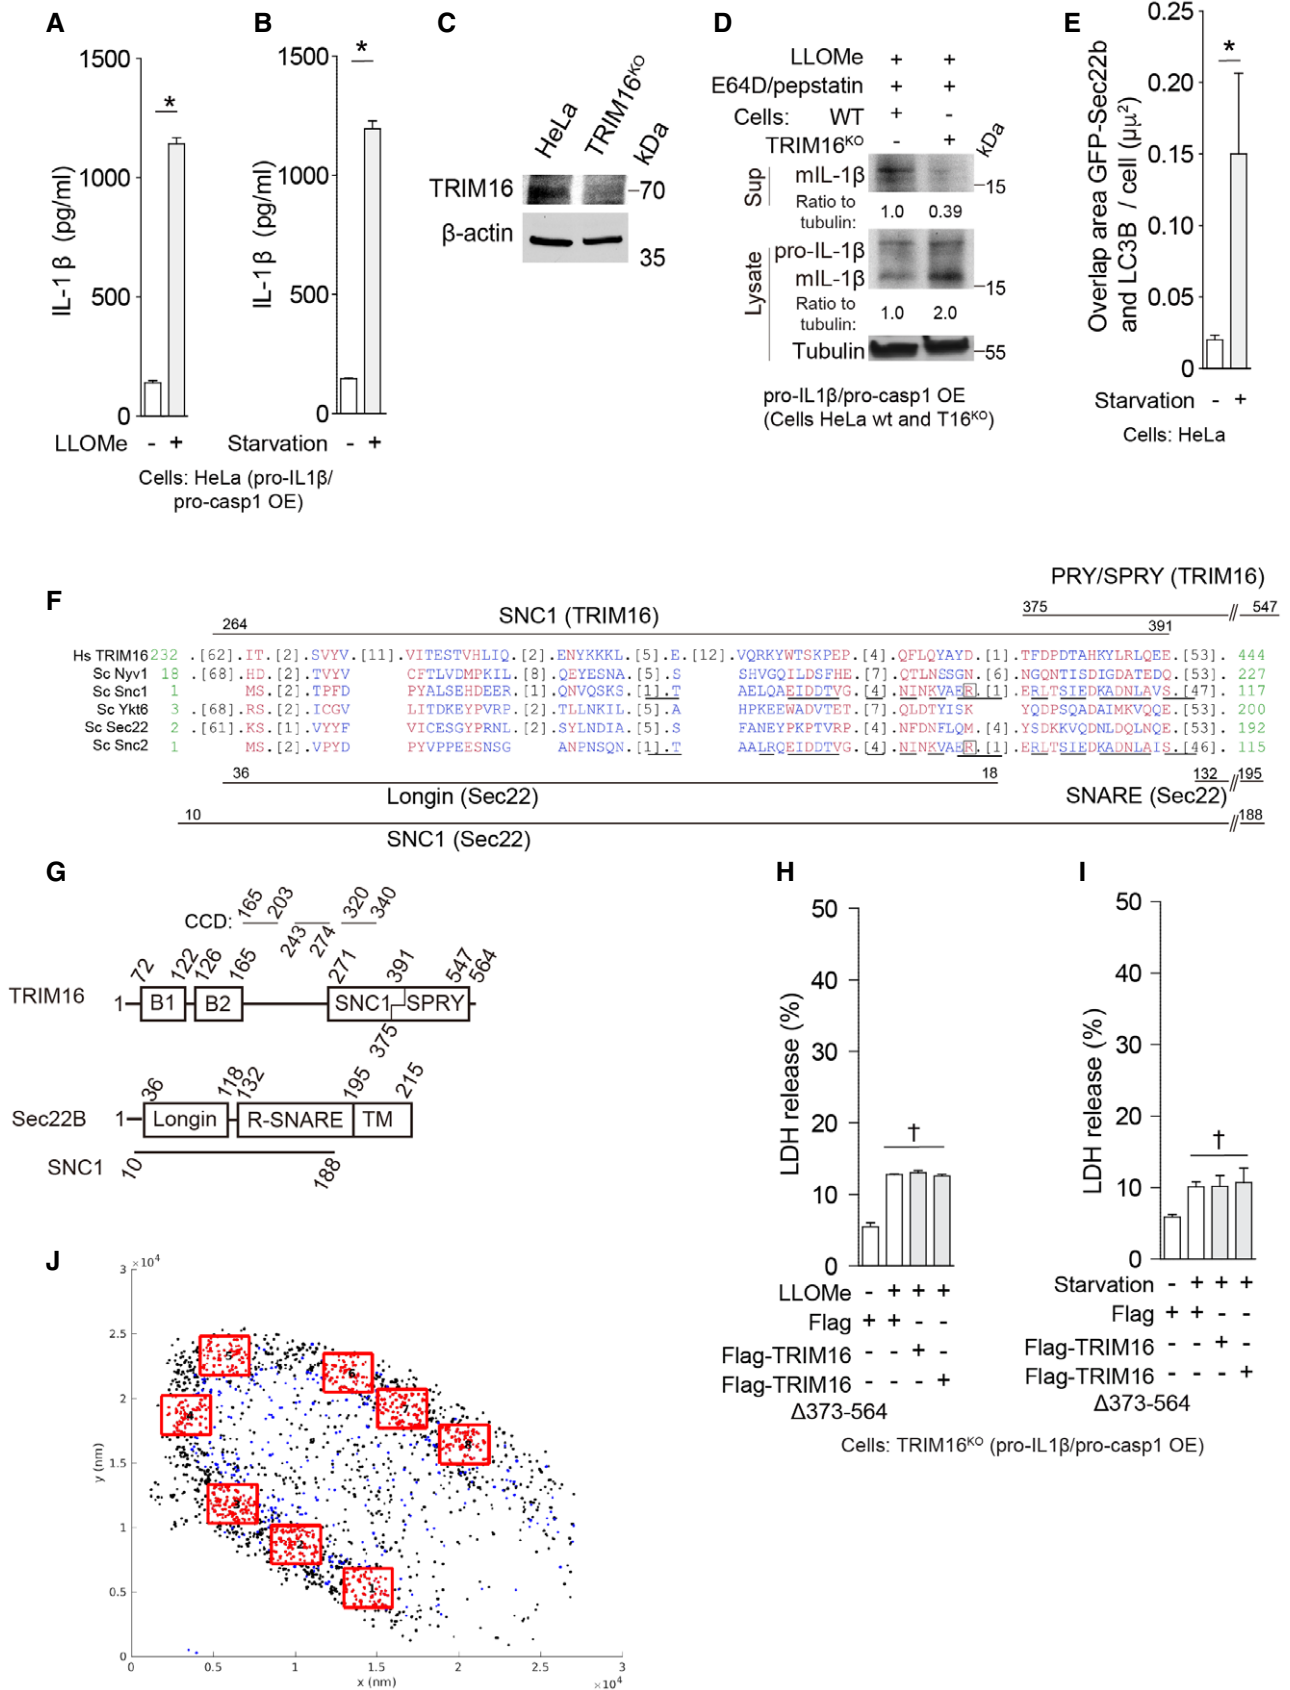

Figure EV3.

**Figure EV4. R-SNARE Sec22b participates in IL-1 $\beta$  secretion.**

- A HeLa cells subjected to knockdown as indicated were treated with LLOMe, and high content analysis of LC3 puncta formation in response to LLOMe was performed using a Cellomics HCS scanner (epifluorescence) and iDEV software. Masks, software-defined objects (primary objects, cell outlines; internal secondary objects, LC3 puncta). Scale bar, 5  $\mu$ m.
- B Average count of LC3 puncta per cell illustrated in (A), carried out in 96-well plates with 49 fields per well and 500 primary objects per field.
- C Immunoblot analyses of knockdown efficacies in THP-1 cells.
- D, E LDH release data for samples in (D) Fig 4A and (E) Fig 4B.
- F Immunoblot analyses of knockdown efficacies in human primary macrophages (MDM).
- G LDH release data for samples in Fig 4C.
- H–K IL-1 $\beta$  levels or LDH release in supernatants of either wild-type or ATG9 knockout MEFs reconstituted with flag-pro-IL-1 $\beta$  and myc-caspase-1 and treated as indicated.
- L, M HeLa cells transfected with mature IL-1 $\beta$  (mIL-1 $\beta$ ) were subjected to siRNA knockdowns and IL-1 $\beta$  release measured after LLOMe stimulation; blot shows Sec22b knockdown efficiency.
- N–Q IL-1 $\beta$  or LDH release from HeLa cells overexpressing GFP-sec22b or GFP and mature mIL-1 $\beta$  upon stimulation by LLOMe or starvation.
- R Immunoblot analyses of knockdown efficacies in HeLa cells stably expressing mRFP-GFP-LC3 (tandem HeLa) configured for simultaneous IL-1 $\beta$  secretion measurements by expressing flag-pro-IL-1 $\beta$  and myc-caspase-1.

Data information: Means  $\pm$  SEM;  $n \geq 5$ , except for immunoblot quantifications where  $n \geq 3$ . \* $P < 0.05$ , † $P \geq 0.05$  (t-test for G–L, N–Q; ANOVA for B, D).

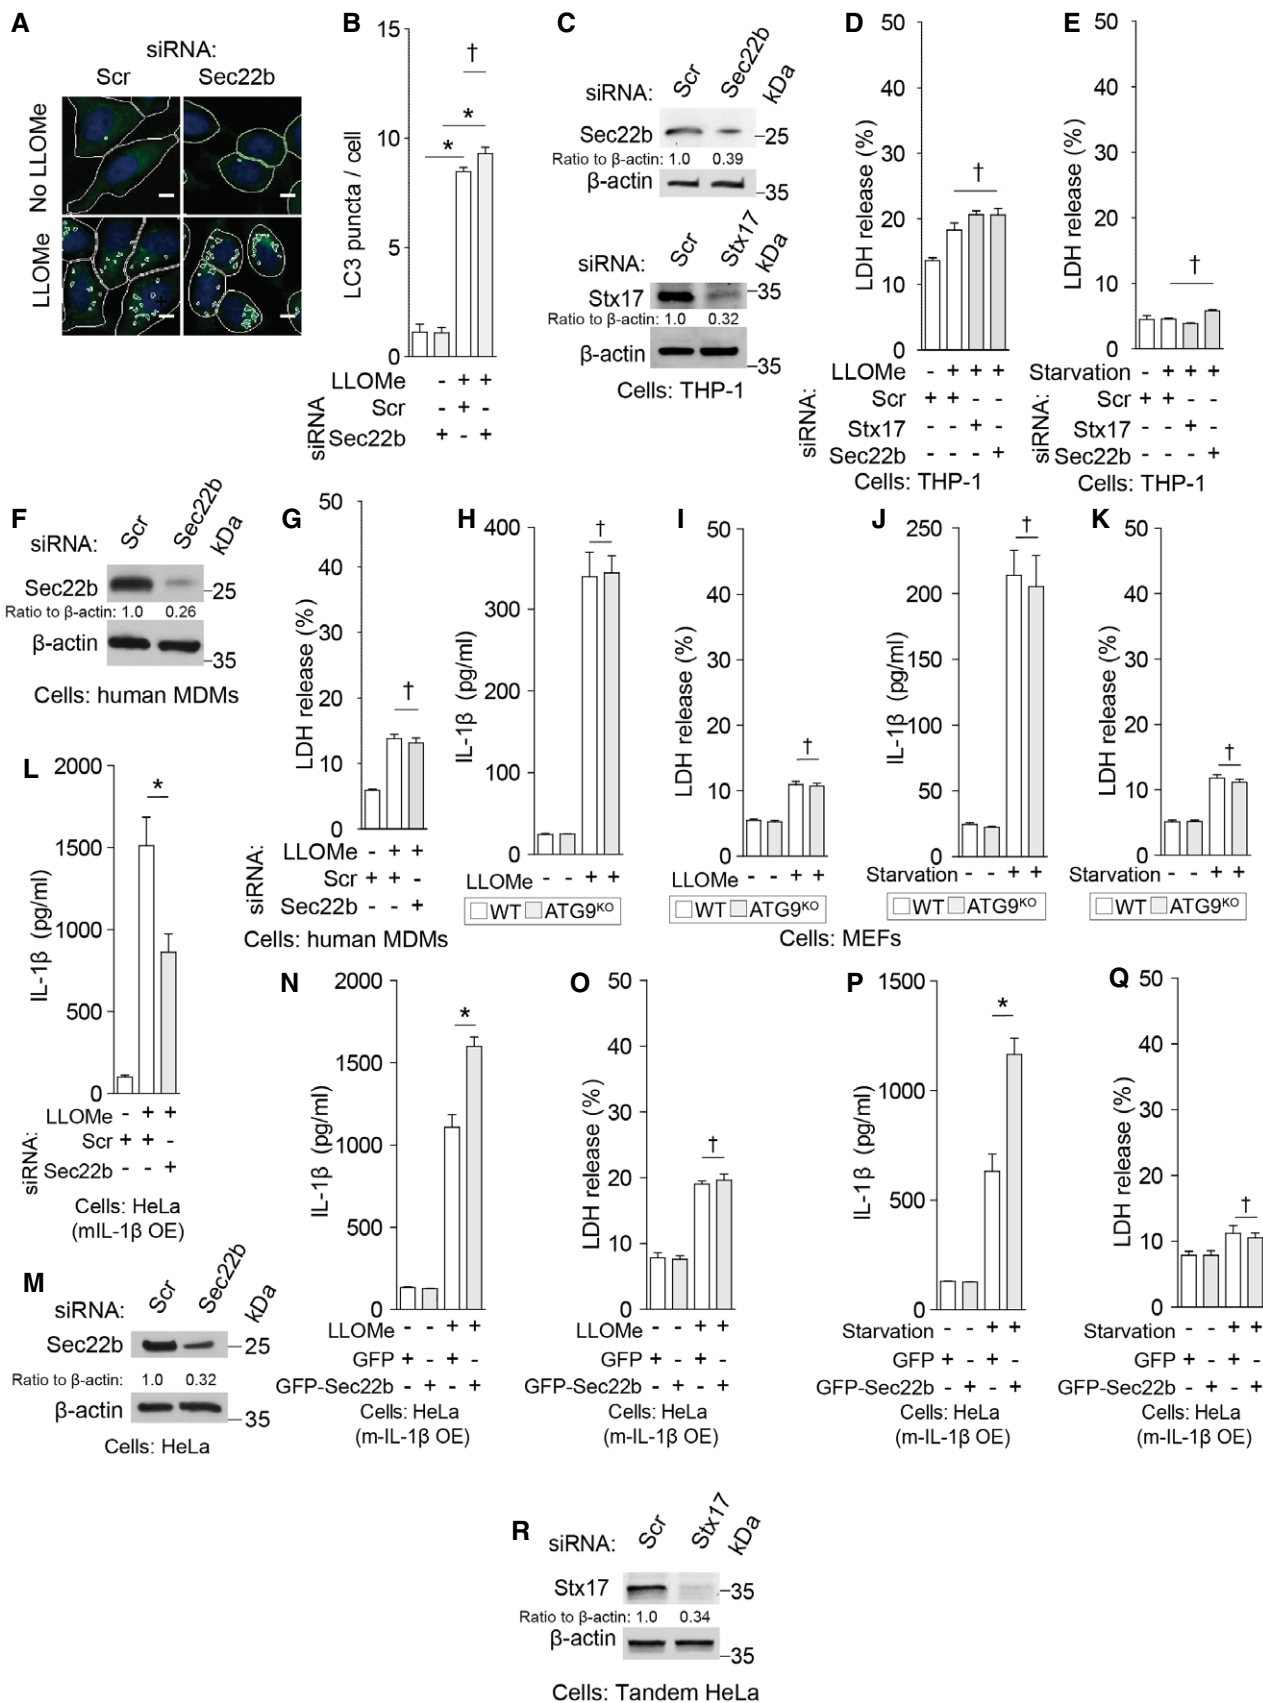

Figure EV4.

**Figure EV5. Q<sub>bc</sub>-SNAREs and plasma membrane Q<sub>a</sub>-SNAREs syntaxins 3 and 4 participate in IL-1 $\beta$  secretion.**

- A Immunoblot analyses of knockdown efficacies in THP-1 cells.  
B, C LDH release data for (B) Fig 5A and (C) Fig 5B.  
D Immunoblot analyses of knockdown efficacies in primary human MDM cells.  
E, F Levels of (E) IL-1 $\beta$  and (F) LDH release determined in supernatants from primary human MDM cells that were subjected to knockdowns as indicated and were sequentially treated with LPS and LLOMe.  
G Immunoblot analyses of knockdown efficacies in HeLa cells.  
H, I Levels of (H) IL-1 $\beta$  and (I) LDH release were determined in supernatants from HeLa cells reconstituted for IL-1 $\beta$  secretion and treated with LLOMe.  
J, K Levels of (J) IL-1 $\beta$  and (K) LDH release were determined in supernatants from HeLa cells reconstituted for IL-1 $\beta$  secretion and starved in EBSS.  
L Co-IP analysis between SNAP-23 with Sec22b in lysates from HeLa cells treated with NEM and DTT as indicated.  
M Immunoblot analyses of knockdown efficacies in THP-1 cells.  
N LDH release data from Fig 5C.  
O Immunoblot analyses of knockdown efficacies in primary human MDM cells.  
P, Q Levels of (P) IL-1 $\beta$  and (Q) LDH release determined in supernatants from primary human MDM cells that were subjected to knockdowns as indicated and were sequentially activated with LPS and treated with LLOMe.  
R Conventional autophagy response to starvation measured by LC3 puncta (HC imaging and analysis) in HeLa cells knocked down as indicated.  
S Knockdown efficacies in cells corresponding to panel (R).

Data information: Means  $\pm$  SEM;  $n \geq 5$ , except for immunoblot quantifications where  $n \geq 3$ . \* $P < 0.05$ , † $P \geq 0.05$  (t-test for P, Q; ANOVA for B, C, E, F, H–K, N, R).



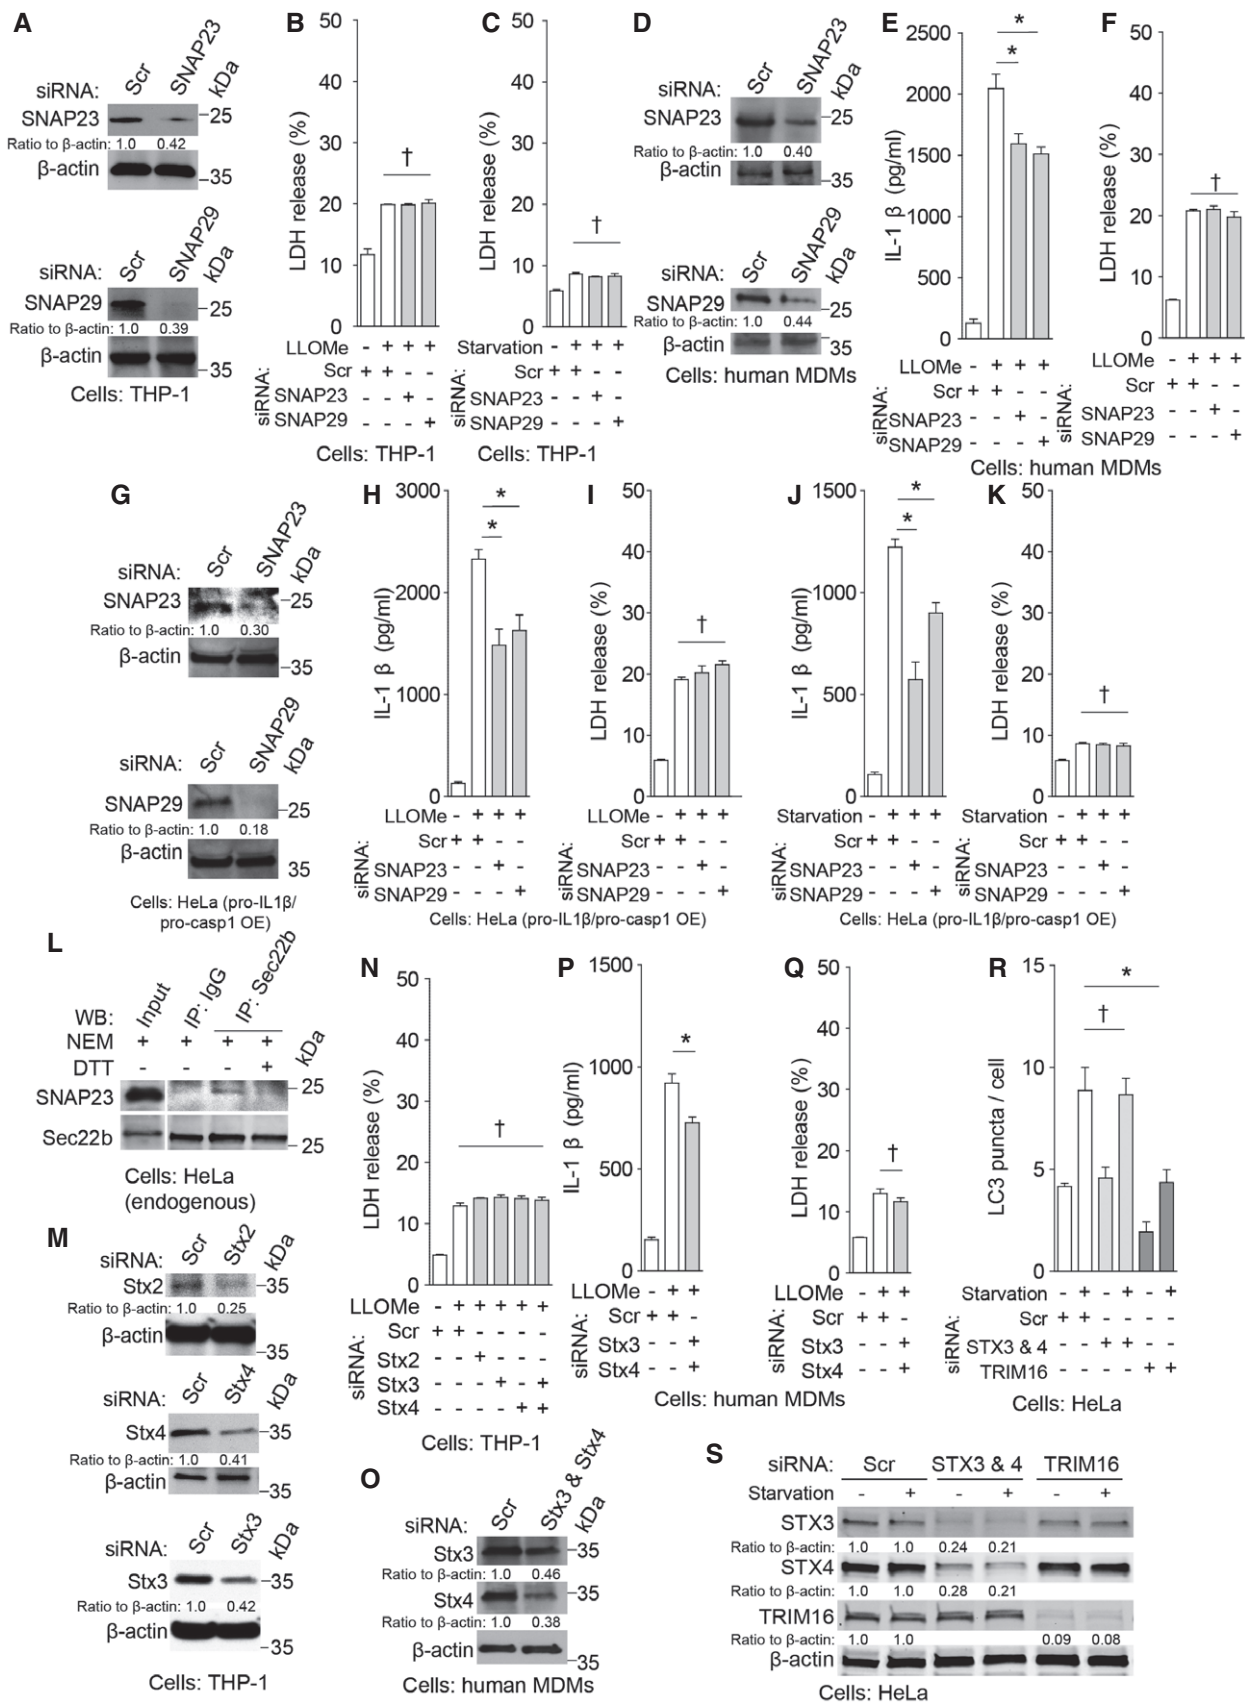

Figure EV5.

**Figure EV6. Secretory autophagy machinery plays a role in unconventional secretion of ferritin.**

- A Immunoblot analysis of the levels of FTH1 in supernatants from THP-1 cells that were subjected to knockdown as indicated and were sequentially treated with LPS and LLOMe.
- B Ferritin levels in supernatants of primary human MDM macrophages subjected to knockdowns as indicated and treated sequentially with LPS and LLOMe.
- C Ferritin levels in supernatants of THP-1 cells subjected to knockdowns as indicated and infected with *M. tuberculosis* Erdman as indicated.
- D, E (D) Ferritin levels and (E) LDH release in supernatants of primary human MDM cells subjected to knockdowns as indicated and infected with *M. tuberculosis* as indicated.
- F, G (F) Ferritin levels and (G) LDH release in supernatants of primary human MDM cells infected with *M. tuberculosis* as indicated.
- H LDH release data from Fig 6E.
- I, J Immunoblot analyses of knockdown efficacies in THP-1 cells.
- K, L Levels of (K) IL-1 $\beta$  and (L) LDH release determined in supernatants from THP-1 cells subjected to knockdowns as indicated and were sequentially treated with LPS and LLOMe.
- M Co-IP analysis of interaction between FTH1 with GFP-TRIM16, GFP-galectin-8, and GFP-Sec22b.

Data information: Means  $\pm$  SEM;  $n \geq 5$ , except for immunoblot quantifications where  $n \geq 3$ . \* $P < 0.05$ , † $P \geq 0.05$  (vs. LLOMe-treated or Mtb-infected scr control or indicated) (t-test for F–H, K, L; ANOVA for B–E).

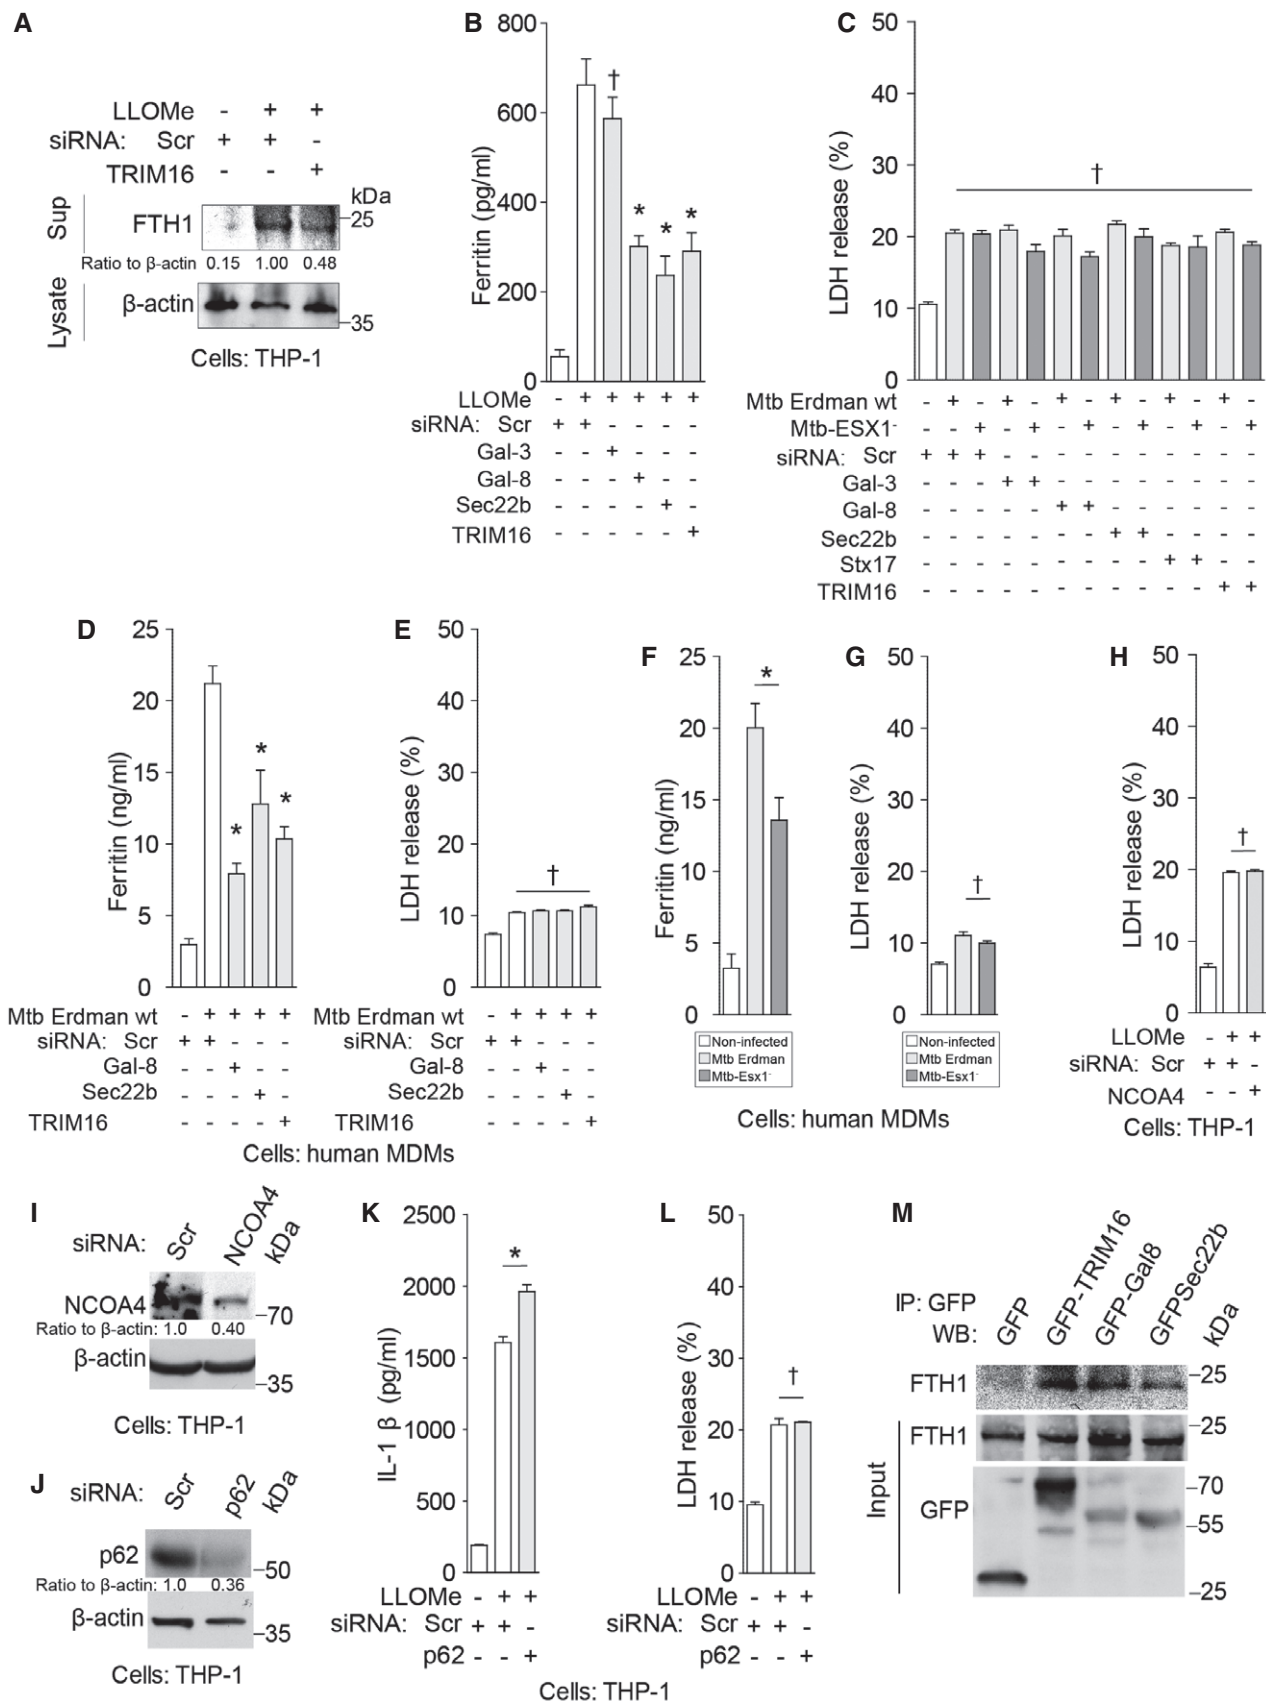

Figure EV6.
